# Supplementary material for: Fabrication and characterization of a NiO–ZnO/PANI-CNTs composite for sensing of methanol in an aqueous environment
Source: Royal Society of Chemistry journal article supplement (doi:10.1039/d3ra06850a), 2023-01-01
Supplement: d3ra06850a1.pdf [file d3ra06850a1.pdf]

## Electronic Supplementary Information (e-SI)

### **Fabrication and Characterization of a NiO-ZnO/PANI-CNTs Composite for Sensing of Methanol in an Aqueous Environment†**

Pham Thi Nam, ‡<sup>a</sup> Nguyen Thi Thom, ‡<sup>a</sup> Vo Thi Kieu Anh,<sup>a</sup> Huynh Le Thanh Nguyen,<sup>b</sup> Nguyen Thi Thu Trang,<sup>a</sup> Nguyen Thai Hoang,<sup>b</sup> Nguyen Vân-Anh,<sup>c</sup> Le Viet Hai,<sup>\*b</sup> Tran Dai Lam,<sup>\*ad</sup>

<sup>a</sup>*Institute for Tropical Technology, Vietnam Academy of Science and Technology, 18 Hoang Quoc Viet, Hanoi, Viet Nam*

<sup>b</sup>*HCM City University of Science, Vietnam National University HCM City, 227 Nguyen Van Cu, Ho Chi Minh City, Viet Nam*

<sup>c</sup>*School of Chemistry and Life Science, Hanoi University of Science and Technology, 1 Dai Co Viet Road, Hanoi, Viet Nam*<sup>d</sup>*Graduate University of Science and Technology, Vietnam Academy of Science and Technology, 18 Hoang Quoc Viet, Hanoi, Viet Nam*

‡*Authors equally contributed to this work*

*\*Corresponding authors*

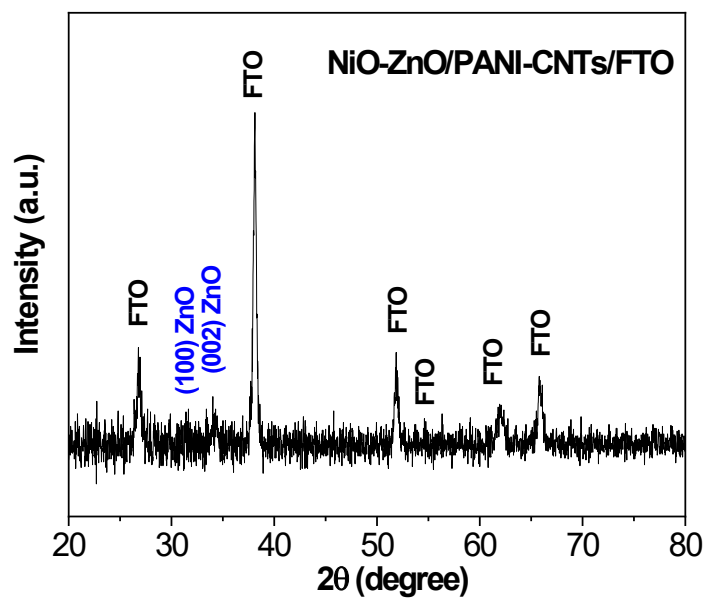

Fig. S1. XRD pattern of NiO-ZnO/PANI-CNTs/FTO electrode

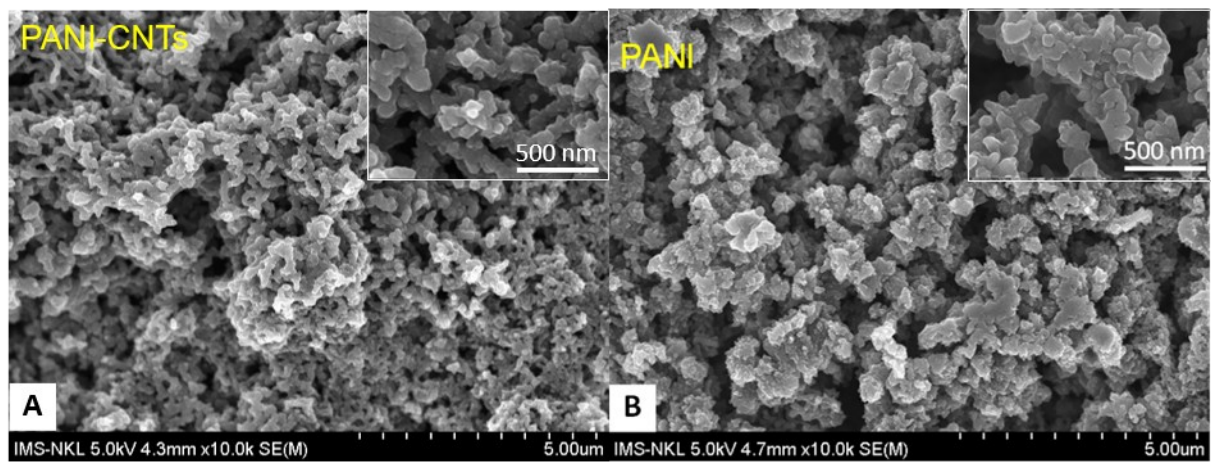

Fig. S2. SEM images of (A) PANI-CNTs and (B) PANI

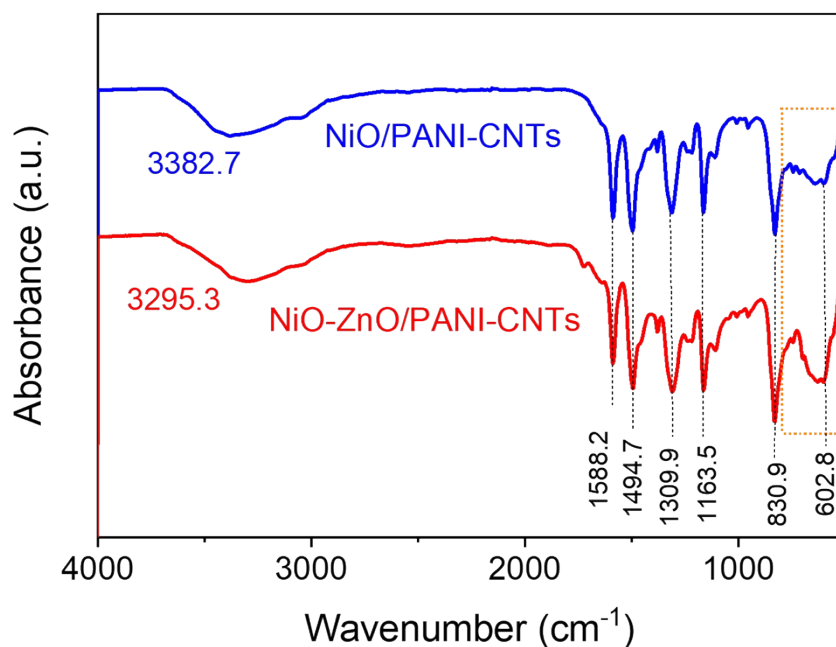

Fig. S3. FTIR of PANI-CNTs, NiO/PANI-CNTs and NiO-ZnO/PANI-CNTs

Fig. S3 shows the FTIR spectra of the two composites, NiO-ZnO/PANI-CNTs, and NiO/PANI-CNTs, pointing out the distinct peaks that are associated with the functional group vibration of PANI:  $3300\text{ cm}^{-1}$  (-N-H- stretching);  $1588\text{ cm}^{-1}$  and  $1494\text{ cm}^{-1}$  (C = C stretching of the quinoid and benzenoid ring);  $1309$  (C-N-C stretching mode of the second arylamine);  $1153\text{ cm}^{-1}$  (C-H in-of-plane bending of the quinoid ring);  $830\text{ cm}^{-1}$  (in-of-plane bending) and the band at around  $602\text{ cm}^{-1}$  could be assigned to the Ni – O stretching vibration<sup>1</sup>. The Zn-O stretching frequency was not in the measurement range, which should be in the range of  $400\text{ cm}^{-1} - 500\text{ cm}^{-1}$ <sup>2</sup>.

## References

1. N. Thi Kim Ngan, N. Thi Thom, N. N. X. An, L. V. Hai, P. Thi Nam, H. Le Thanh Nguyen, P. Van Viet, N. Thi Thu Trang, N. T. Hoang and D. L. Tran, *Journal of The Electrochemical Society*, 2021, **168**, 107509.
2. M. N. Siddique, T. Ali, A. Ahmed and P. Tripathi, *Nano-Structures & Nano-Objects*, 2018, **16**, 156-166.
